# Supplementary material for: A Paracrine-to-Autocrine Shunt of GREM1 Fuels Colorectal Cancer Metastasis via ACVR1C
Source: Research Square preprint supplement (doi:10.21203/rs.3.rs-7484753/v1), 2025-09-17

**Raw images of the immunoblotting experiments**

**Figure 2:**


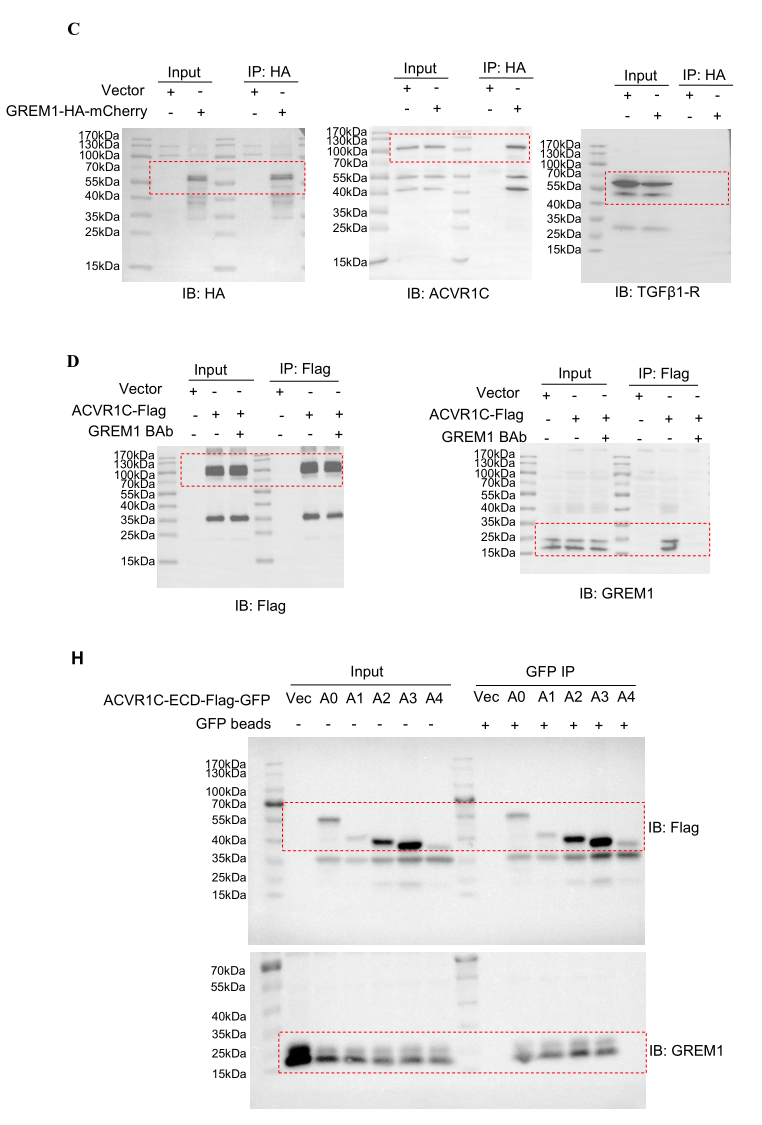


**Figure 2:**


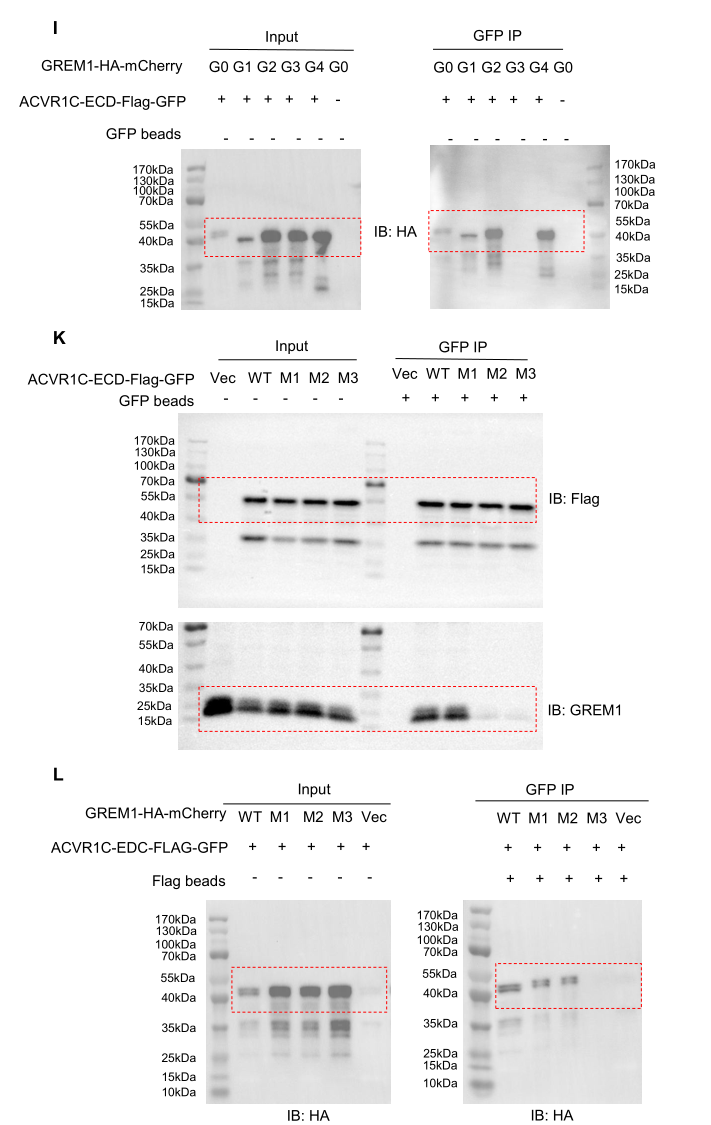


**Figure 3:**


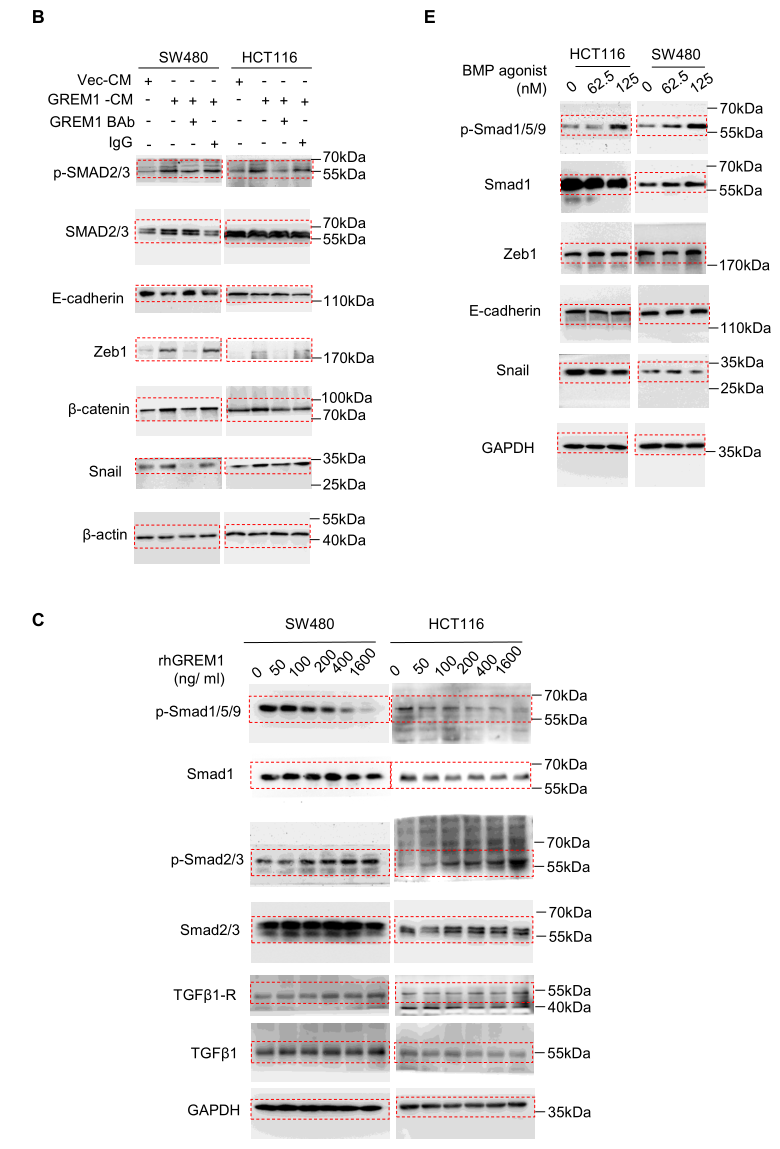


**Figure 3:**


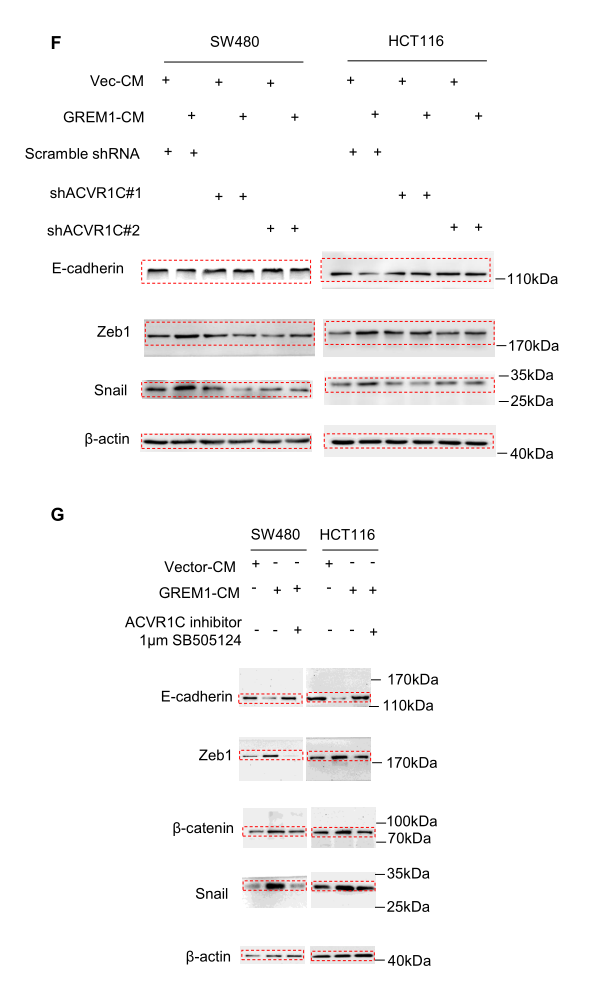


**Figure 4:**


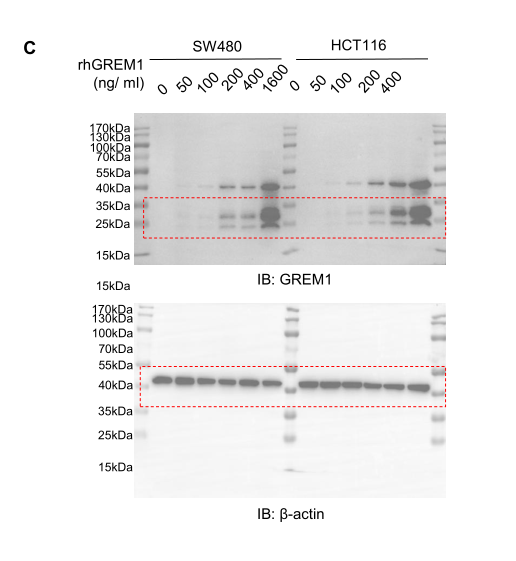


**Supplementary figure 4:**


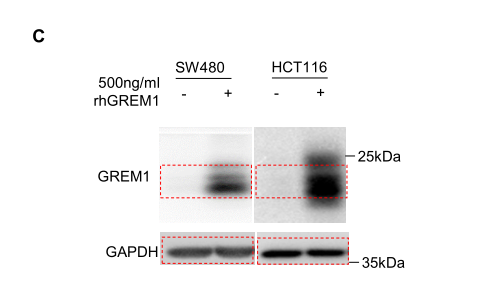


**Supplementary figure 7:**


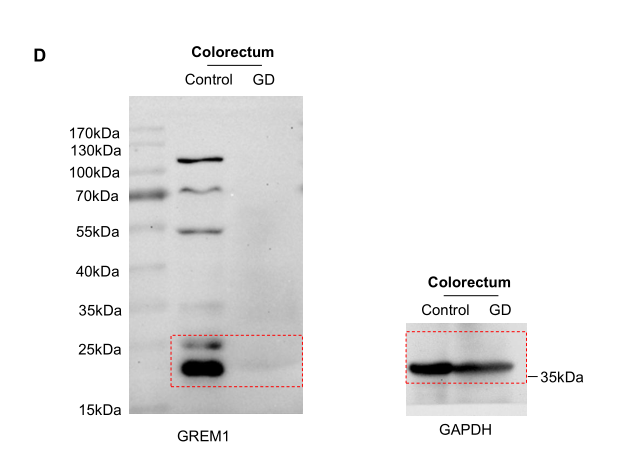

Supplement: Supplementary file 1 [file 1f80e03ee14611b0be4fddd8.docx]
